# Leukopenia, weight loss and oral mucositis induced by 5-Fluorouracil in hamsters' model: A regenerative approach using electrospun poly(Lactic-co-Glycolic Acid) membrane

Ana Chor<sup>1,5,\*</sup>, Hélio dos Santos Dutra<sup>2</sup>, Marcos Lopes Dias<sup>3</sup>, Raquel Pires Gonçalves<sup>3</sup>, Christina Maeda Takiya<sup>4,\*</sup>, Alexandre Malta Rossi<sup>5</sup> and Marcos Farina<sup>1</sup>

<sup>1</sup>Biomaterialization Laboratory, Institute of Biomedical Sciences, Federal University of Rio de Janeiro, Rio de Janeiro 21941-902, Brazil

<sup>2</sup>University Hospital, Bone Marrow Transplantation Unit, Federal University of Rio de Janeiro, Rio de Janeiro 21941-617, Brazil

<sup>3</sup>Catalysis Laboratory for Polymerization, Recycling and Biodegradable Polymers, Institute of Macromolecules Professor Eloisa Mano, Federal University of Rio de Janeiro, Rio de Janeiro 21941-598, Brazil

<sup>4</sup>Immunopathology Laboratory, Institute of Biophysics Carlos Chagas Filho, Federal University of Rio de Janeiro, Rio de Janeiro 20941-902, Brazil

<sup>5</sup>Department of Condensed Matter, Applied Physics and Nanoscience, Brazilian Center for Research in Physics, Rio de Janeiro 22290-180, Brazil

\*These authors contributed equally to this work

**Correspondence to:** Ana Chor, **email:** [anamedoral@gmail.com](mailto:anamedoral@gmail.com), <https://orcid.org/0000-0002-2259-7827>

**Keywords:** leukopenia; weight loss; oral mucositis; PLGA dressing; regeneration

**Received:** February 05, 2024

**Accepted:** December 09, 2024

**Published:** February 18, 2025

**Copyright:** © 2025 Chor et al. This is an open access article distributed under the terms of the [Creative Commons Attribution License](https://creativecommons.org/licenses/by/4.0/) (CC BY 4.0), which permits unrestricted use, distribution, and reproduction in any medium, provided the original author and source are credited.

## ABSTRACT

Clinical parameters of leukogram and weight were analyzed in animal models before and after seven days of 5-FU infusions. A comparison of leukograms before and after 5-FU administrations was analyzed. The results showed a significant difference ( $p = 0,004$ ), confirming immunosuppression. There was a decrease in the weight of the animals after 7 days of 5-FU infusions ( $p = 0.02$ ). After immunosuppression occurred, oral mucositis (OM) ulcerative lesions were observed. Two of the animals were selected to receive PLGA dressings. Then, electrospun PLGA membranes, with or without autologous cells, were applied to the ulcerative lesions, aiming to accelerate the regeneration process. Although this therapeutic innovation for OM lesions was still not tested in the bioengineering area, morphological analysis presented promising results. Lesions covered by cell-free PLGA, exhibited areas of inflammation persistence and angiogenesis. The cell-seeded PLGA membrane exhibited complete reepithelialization after 6 days, with minor inflammatory infiltrate. Interestingly, the present work showed preclinical parameters of cachexia induced by chemotherapy for cancer treatment. Moreover, it showed an innovative approach by applying dressings consisting of electrospun PLGA with the addition of autologous mesenchymal cells for OM ulcerative lesions. This promising innovation will pave the way for future applications in oral mucosa lesions.

## INTRODUCTION

5-Fluorouracil (5-FU) is an antimetabolite that promotes DNA damage by inhibiting thymidylate synthetase (TS), and depleting thymidine triphosphates (TTPs) available for DNA synthesis [1]. 5-FU can

be incorporated into DNA and RNA in the region of thymine or uracil, respectively [2]. So, the incorporation of analogues of purine and pyrimidines bases to DNA during the S phase of the cell cycle, prevents the addition of nucleotide bases, with consequent failure in DNA replication [2, 3]. Leukopenia is a hematological

toxicity induced by 5-FU, a first-choice chemotherapy agent for several cancers. Furthermore, weight loss, mucositis, and diarrhea associated with the same agent, are parameters that influence quality of life and treatment outcomes during cancer treatment. However, it is important to highlight that weight loss has been analyzed as a parameter for cachexia in cancer treatment, which increases muscle and adipose tissue loss leading to weakness and fatigue [4].

Frequently, oral and gastrointestinal mucositis associated with 5-FU agent, results in serious complications during head and neck cancer treatment, due to disruptions in soft tissues [5]. On the other hand, intensive association of other chemotherapy agents can culminate in deleterious effects, causing serious OM lesions, which can affect patient's compliance and treatment outcomes [6]. Despite better survival rates after cancer treatments, several therapies may increase the percentage of OM to approximately 90–100% [5, 7, 8]. To date, there is no effective treatment for OM lesions; however, investigations with animal models are increasing to allow innovative approaches to ameliorate the inflammation process that culminates in OM lesions [9–11]. In this regard, Chor reviewed the molecular pathways of OM, and discussed a variety of emerging approaches in preclinical models, with potential for future clinical applications [12]. Interestingly, natural products like honey or olive oil have been explored to treat chemotherapy-induced OM in children with leukemia [13]. Metformin, an antidiabetic drug, was explored to treat the chemotherapy effects of non-diabetic breast cancer patients [14]. Zinc was recently used in the prevention of OM in children with cancer receiving intensive chemotherapy [15]. Topical Omega-3 nanoemulgel was recently explored to treat radiotherapy-induced OM in head and neck cancer patients [16]. And, Collela reported a collection of therapies, which have shown significant reductions in the severity and incidence of OM [5].

Biomaterials in the area of tissue engineering and regenerative medicine have been well explored as promising therapies for OM lesions in preclinical and clinical trials [11, 12, 16, 17]. One of the trends in bioengineering is the use of natural or synthetic three-dimensional (3D) biodegradable scaffolds as a biomimetic strategy. Such strategy aims to reproduce the natural extracellular matrix, providing an ideal microenvironment for cell adhesion and proliferation [18]. Notably, the electrospinning process is a method of fiber-forming scaffolds that mimic the biological environment. This technology is booming in research and the industrialization of advanced fiber-based materials [19], which can be programmed to produce fibers in a variety of structural diversity of individual electrospun morphologies. A diversity of fiber-forming materials has been applied in many other fields, such as, tissue engineering [20–22], drug delivery [20], wound dressing [22], biotechnology

[23], and others [19]. One example is the electrospun PLGA whose basic materials are the biocompatible monomers lactic and glycolic acids. This biomaterial has been investigated, showing its biodegradability and good mechanical strength, and has been applied in the tissue engineering area [24]. For instance, Madin-Darby canine kidney cells (MDCK) lineage and fibroblast-like cells from a hamster's cheek pouch showed adhesion and proliferation onto electrospun PLGA (85:15) membranes [25]. Those cells rearranged into a network of interconnected cells among the interconnected fibers and pores over time [25].

Advancements in tissue engineering and regenerative medicine have opened ways for a variety of combined biomaterials taken by different processes [18]. Such materials have been successfully applied in the regenerative process of hard and soft tissues of the oral cavity as well [26, 27]. The present work explored the adverse effects of leukopenia and weight loss during 5-FU infusions in hamster models, resulting in OM lesions. On the other hand, the present work delved into the foundations of tissue engineering and regenerative medicine, to explore an innovative therapeutic modality for OM ulcerative lesions, with the potential of treating other tissue injuries [28].

## RESULTS

### Comparison of leukograms before and after 5-FU or saline solution administrations

The results were divided into the comparison of the leukograms before and after 5-FU administration, showing significant results related to immunosuppression after the first 5-FU infusion (Figure 1,  $p = 0,03$ ), with representative lower and higher values of the medians before 5-FU (287,5–935,0) and after 5-FU (185,0–322,5) Table 1. Results of the leukograms before and after saline solution (SS) administration, showed no significant results related to immunosuppression after the first SS infusion (Figure 1,  $p = 0,222$ ), with representative lower and higher values of the medians before saline solution (355,0–825,0), and after saline solution (360,0–577,5) Table 1. Another analysis was performed between the independent leukograms, related to independent treatments in different animals, 4 days after 5-FU and SS administration. The statistical analysis revealed significant differences related to the 5-FU-induced immunosuppression in comparison with the population of animals treated with SS (Figure 1,  $p = 0,004$ ). In this context, the  $p < 0,05$  value was considered the reference of the statistical hypothesis.

### Comparison of independent weight loss of 5-FU and saline solution (SS) groups of animals

The populations of animals with distinctive modalities of treatments were analyzed (Figure 2A, 2B).

**Table 1: Medians corresponding to the lower and higher values of leukogram in each population of animals**

| Measures | Before - 5-FU/mm <sup>3</sup> | After - 5-FU/mm <sup>3</sup> | Before - SS/mm <sup>3</sup> | After - SS/mm <sup>3</sup> |
|----------|-------------------------------|------------------------------|-----------------------------|----------------------------|
| Lower    | 2875,0                        | 1850,0                       | 3550,0                      | 3600,0                     |
| Median   | 5650,0                        | 2123,0                       | 4500,0                      | 4250,0                     |
| Higher   | 9350,0                        | 3225,0                       | 8250,0                      | 5775,0                     |

The statistical analysis revealed significant results for 5-FU-induced immunosuppression (Figure 2A) ( $p = 0,02$ ) related to weight decrease, analyzed before and after 5-FU infusion, and represented by the minimum and maximum values of the medians before 5-FU (122,0–147,0) Table 2, and after 5-FU (115,5–140,0) Table 2. On the other hand, graphic B (Figure 2B) is exhibiting the averages of the SS population, analyzed before and after 5-FU infusion. Results showed no significant statistical difference related to weight decrease ( $p = 0,19$ ), although decreases have been observed in two animals, represented by the minimum and maximum values of the medians before saline solution (120,0–205,0) Table 2, and after saline solution (120,0–202,0) Table 2. The  $p < 0,05$  value was considered the reference of the statistical hypothesis.

### Macroscopic image and histomorphological analysis of OM ulceration

Figure 3A depicts the macroscopic view of 5-FU-induced OM ulceration in the model, exhibiting the ulcer

formation with a crateriform aspect, everted edges and apparent necrotic tissue, characterizing a pseudomembrane surrounded by hyperemic areas of mucous tissue with vessels and hemorrhagic areas. In the histomorphological analysis (Figure 3B–3E); Figure 3B represents the histomorphological analysis of the cheek pouch of the animal with 5-FU-induced OM ulceration (narrow arrows). The image depicts the ulcerative region with the disrupted epithelial layer (long arrow) showing the pseudomembrane formation represented by the necrotic area (asterisk). Figure 3C exhibits greater magnification of the same region observed in Figure 3B, showing a detail of the necrosis zone (\*) (pseudomembrane), and with predominant inflammatory infiltrate. Figure 3D depicts a higher magnification of the same region in (B) (long arrow) showing an ulcerated area with cellular debris and the presence of an epithelial tongue at the end (regenerative epithelium after the arrow). Figure 3E depicts a higher magnification of the same region in (D) showing the evidence of inflammatory cells in the ulcer region (Figure 3E, square) and vessels in the stroma

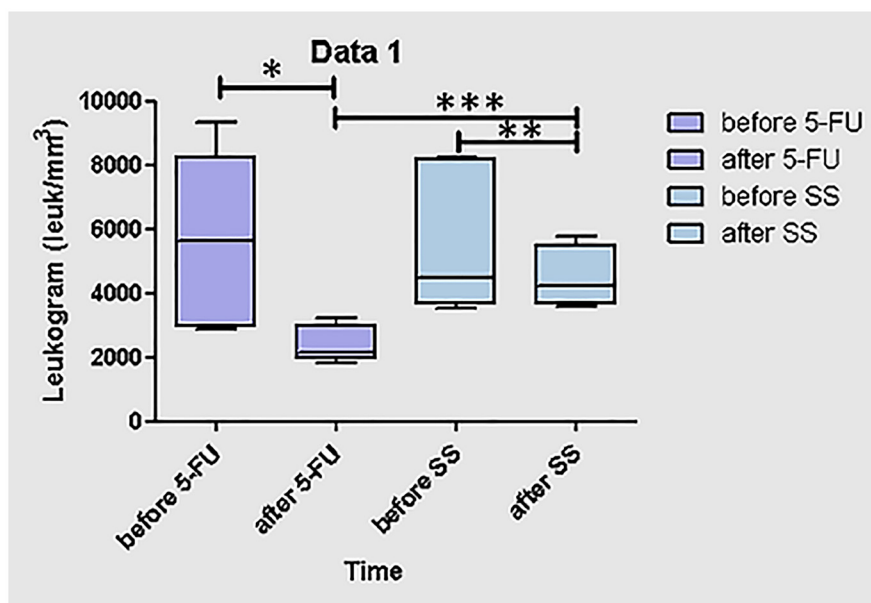

**Figure 1: Representative graphic of leukograms of the population of animals treated with 5-FU or saline solution as control.** (\*) Leukogram before and after 4 days of 5-FU infusion, analyzed by Wilcoxon test, characterizing comparisons between independent leukograms of the same population, paired to be analyzed in different times ( $p = 0,03$ ); (\*\*) Leukogram before and after 4 days of saline solution infusion, analyzed by Wilcoxon test, characterized comparisons between independent leukograms of the same population, paired to be analyzed in different times, exhibit no significant results ( $p = 0,222$ ); (\*\*\*) Leukogram before and after of 5-FU or saline solution infusions, analyzed by Mann Whitney Test, characterized the comparisons between independent leukograms from independent treatments, in different populations of animals at the same time ( $p = 0,04$ ). The  $p < 0,05$  value was considered the reference of the statistical hypothesis.

**Table 2: Medians corresponding to the lower and higher values of weight in each population of animals**

| Measures | Before - 5-FU/mm <sup>3</sup> | After - 5-FU/mm <sup>3</sup> | Before - SS/mm <sup>3</sup> | After - SS/mm <sup>3</sup> |
|----------|-------------------------------|------------------------------|-----------------------------|----------------------------|
| Lower    | 122,0                         | 115,5                        | 120,0                       | 120,0                      |
| Median   | 131,0                         | 120,0                        | 146,0                       | 146,0                      |
| Higher   | 147,0                         | 140,0                        | 205,0                       | 202,0                      |

(Figure 3E, red arrows), as well as the presence of an epithelial tongue at the extremity (regenerative epithelium after the black arrow).

### Macroscopic and histomorphological images of OM and regeneration after PLGA dressing with or without the animal's cells

The macroscopic view of OM ulceration induced by 5-FU and scratch is represented in Figure 4A, showing the necrotic area covering the ulcerated region in the jugal mucosa of the animal. Next, Figure 4B shows the macroscopic view of PLGA dressing without cells covering the ulcerative area, and Figure 4C represents the macroscopic view of OM ulceration 6 days after PLGA dressing without cells. Note the amelioration of the ulcer, still with hyperemia area surrounding the remaining ulcerative region, exhibiting the borders of the ulcer. Figure 4D is showing the histomorphological image of

OM ulceration 6 days after 5-FU administration. Note that there is no epithelial layer and the inflammatory infiltrate persists in the subepithelial region (Figure 4D, square). Figure 4E represents the same image of Figure 4D showing the inflammatory infiltrate adjacent to the regenerative region showing fibroblasts (arrows). Figure 4F represents another animal with 5-FU-induced OM, which was covered with PLGA membrane with the addition of the animal's cells (Figure 4G). Next, Figure 4H shows the macroscopic view of OM regeneration 6 days after PLGA dressing with cells. The regenerative area exhibits the jugal mucosa without ulceration. Figure 4I exhibits the histomorphological image of OM ulceration 6 days after PLGA dressing with the addition of cells, showing the regenerated epithelial layer (white asterisks) and the newly formed tissue in the subepithelial layer (black asterisk). Figure 4J exhibits the same image of (I) showing the proximity of fibroblasts to the basal layer of the epithelium in the regenerated area (arrows).

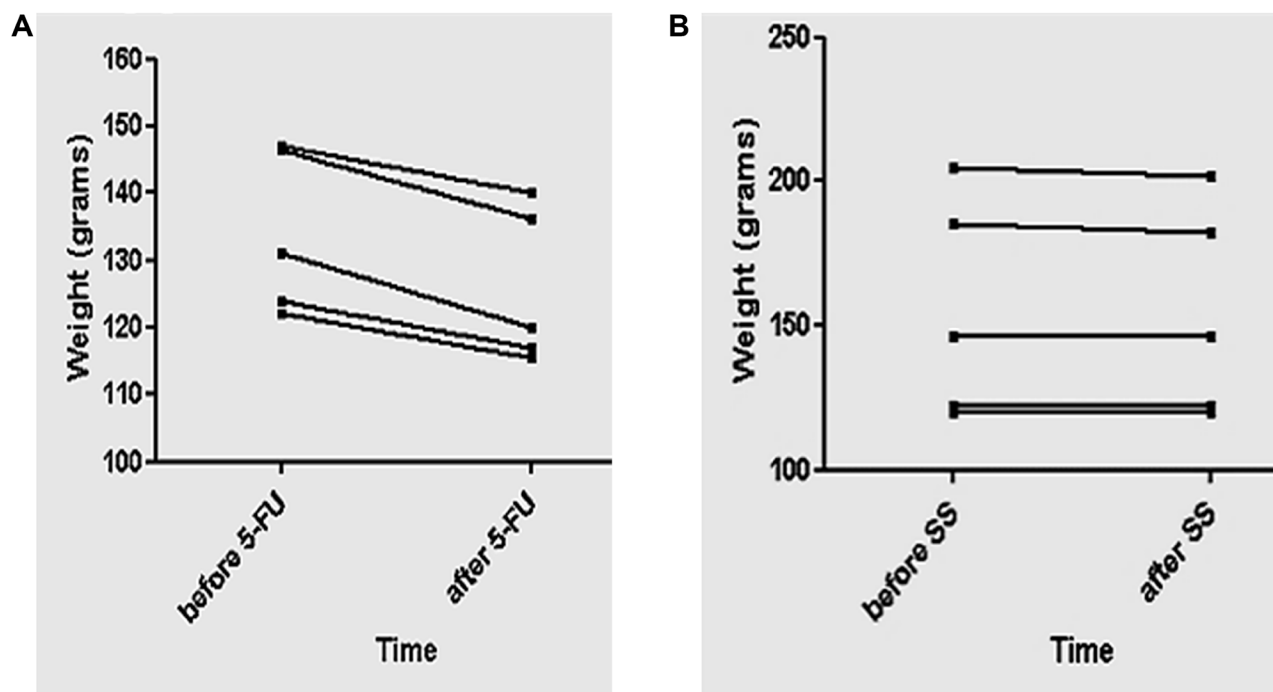

**Figure 2: Representative graphics of the animals' weight treated with 5-FU or SS as control.** (A, B) The representative graphic exhibit the analysis related to the weight before and after 4 days of 5-FU or SS administration, using the paired *t*-test. The analysis is showing comparisons between independent weights at the same population of animals, pared to be analyzed in different times. Graphic A is showing that 5-FU induced weight loss, revealing significant difference ( $p = 0,02$ ). Graphic B is showing comparisons of independent weights in the same population of animals treated with SS, exhibiting no significant statistical difference ( $p = 0,19$ ). The value of  $p < 0.05$  was the reference for the hypothesis of statistical difference.

### Blood vessels and macrophages were observed in the interface of the regenerative area

The histomorphological image of OM ulceration 6 days after PLGA dressing with cells is represented in Figure 5A. In the histomorphological image, the regenerative area (Figure 5A, black asterisk) was observed adjacent to the surrounding site (Figure 5A, white asterisk) after PLGA dressing with the animal cells. In the interface of the regenerative area, newly formed blood vessels were observed (Figure 5A, black arrows), confirmed by  $\alpha$ -SMA ( $\alpha$ -smooth muscle actin)

positive cells in the vessels walls (Figure 5B, asterisks). Also, F4/80 positive cells, macrophages, were observed surrounding the stroma in the interface of the regenerative area (Figure 5C, arrows).

### DISCUSSION

Leukopenia and body weight loss are hallmark clinical signals of 5-FU agent for several cancer treatments [4]. Cancer patients are treated with chemotherapy in cycles. One cycle of chemotherapy comprises five days of chemotherapy infusion, representing one week

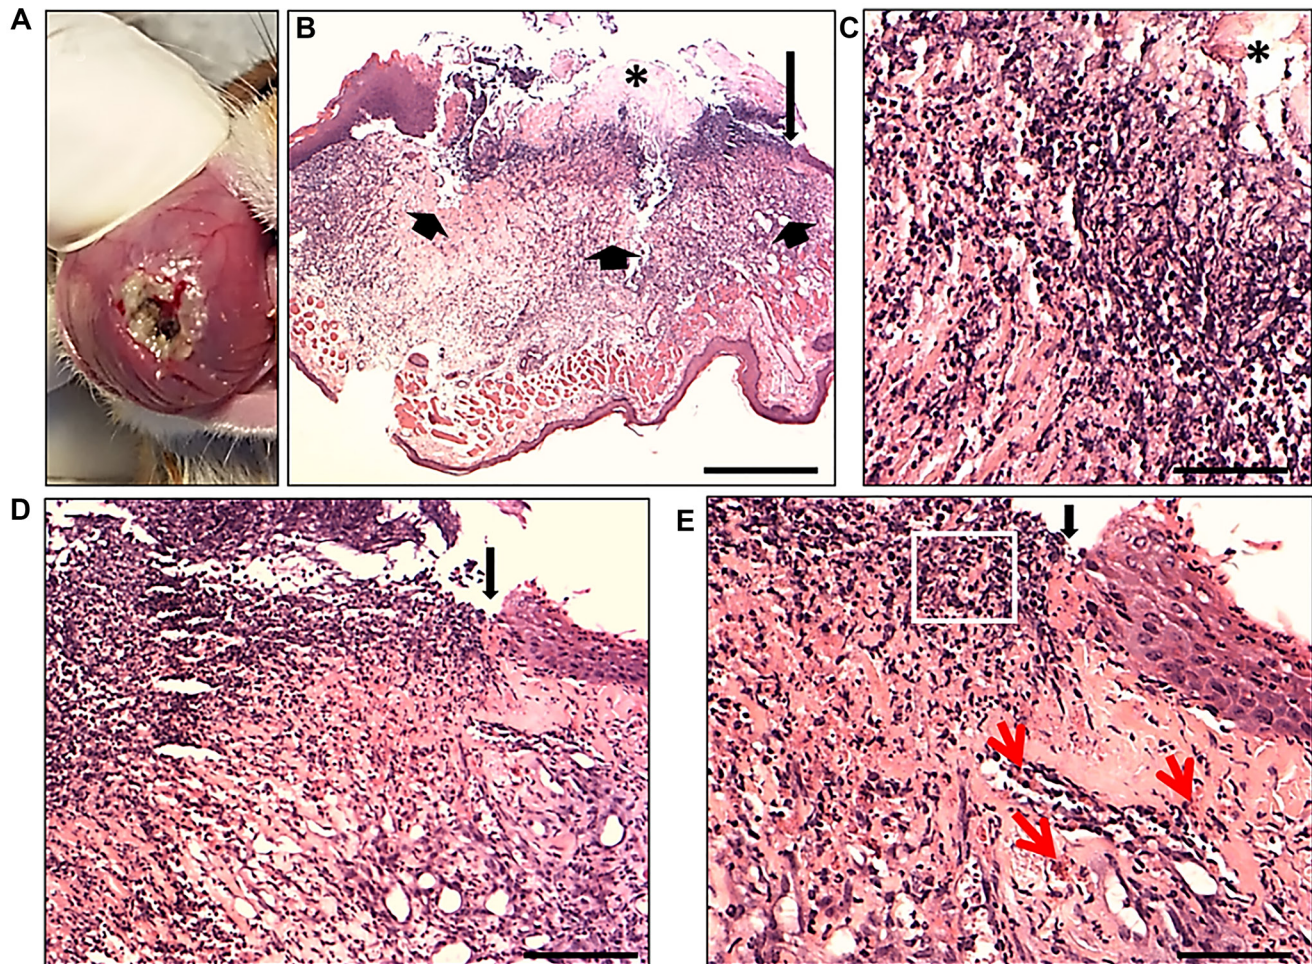

**Figure 3: Representative micrographs of the macroscopic lesion of oral mucositis and histology of the OM ulceration produced in an experimental hamster model 7 days after 5-FU administration and scratch.** Macroscopic view of OM ulceration establishment, 7 days after administration of 5-FU and scratch procedure (A). Note the ulcer with a crateriform aspect, everted edges and apparent necrotic tissue, characterizing a pseudomembrane, surrounded by hyperemic area of mucous tissue with vessels and hemorrhagic areas. (B) Full histological view of ulcer formation (short arrows) induced by 5-FU and scratch, with intense mononuclear inflammatory infiltrate (inflammatory phase). The presence of cellular debris and a zone of necrosis (\*) on the ulcer was exhibited, characterizing the pseudomembrane; above, the long arrow shows a region of epithelial discontinuity; scale bar: 500  $\mu$ m. (C) A greater magnification of the same region observed in (B), shows a detail of the necrosis zone (\*) (pseudomembrane) with predominant inflammatory infiltrate; scale bar: 100  $\mu$ m. (D) Higher magnification of the same region in (B) (long arrow) showing an ulcerated area with cellular debris and the presence of an epithelial tongue at the end (regenerative epithelium) can be seen (after the arrow); scale bar: 200  $\mu$ m. (E) At a higher magnification of the same region in (D), there is evidence of inflammatory cells in the ulcer region (square) and vessels in the stroma (red arrows), as well as the presence of an epithelial tongue at the extremity (regenerative epithelium after the black arrow); scale bar: 100  $\mu$ m. HE stains. Eclipse E800 light microscope (NIKON, Japan).

of treatment. Recently, Vanderveen showed findings consistent with the initial subclinical signals of cachexia after 1 cycle of 5-FU [4]. Those finds in mouse models revealed that one cycle was sufficient to induce significant leukopenia and body weight loss associated with a loss of total skeletal muscle immune cells, and a reduction in select inflammatory mediators [4]. Although in the present study 5-FU was not applied in one cycle of five consecutive days (see Figure 6), results showed leukopenia and weight loss after 3 days of 5-FU infusions in hamster models.

During antineoplastic treatment, the resulting cachexia state is one of the complications associated with chemotherapy, concomitant with the adverse effect of oral mucositis, compromising metabolism homeostasis [29]. During treatment there is a period of immunosuppression, which is treatment-dependent, conferring decrease in neutrophil counts and weight. In the present study, the data confirmed the establishment of immunosuppression, comprising leukopenia and weight loss, resulting in 5-FU-induced OM.

In the present work, the leukogram of the population of animals treated with 5-FU or saline solution were performed before the first chemotherapy or saline solution infusions, and before scratch to produce the oral mucositis lesions.

Immunosuppression was well observed in the overall reduction of the leukogram, but was not significant to demonstrate a difference in weight between the populations of animals treated with 5-FU or saline solution. However, 5-FU promoted significant difference in weight loss. Our results are aligned with the study of Bertoloni and collaborators, who reported weight loss and neutropenia after intravenous 5-FU for oral mucositis establishment in experimental mice model [30]. The authors reported significant results relative to decreases of those parameters in the blood counts, confirming the induced immunosuppression. Moreover, our results are also consistent with the study of Lee and colleagues, who reported reductions in weight loss and neutrophil counts after intraperitoneal infusions of 5-FU, for OM establishment in hamster model [31]. Due to the high

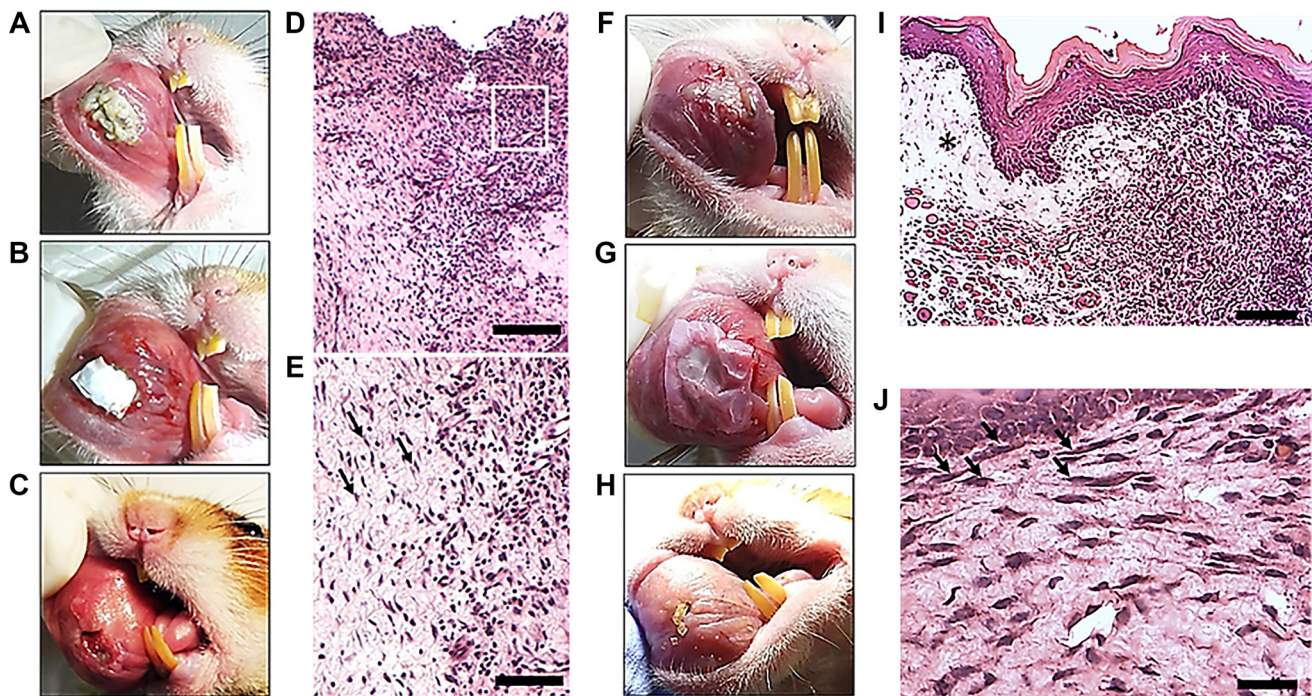

**Figure 4: Macroscopic images of OM ulcerations after 7 days of 5-FU administration, and histomorphological analysis after PLGA dressings with or without the animal's cells.** Macroscopic view of OM ulceration induced by 5-FU and scratch (A). Note the necrotic area covering the ulcerated region in the jugal mucosa of the animal; (B) macroscopic view of PLGA dressing without cells covering the ulcer; (C) macroscopic view of OM ulceration 6 days after PLGA dressing without cells. Note the amelioration of the ulcer, still with tissue hyperemia and visualization of the borders of the ulcer; (D) histomorphological image of OM ulceration 6 days after 5-FU administration (bar: 200  $\mu$ m). Note that there is no epithelial layer and the inflammatory infiltrate persists in the subepithelial region (square); (E) the same image of A showing the inflammatory infiltrate adjacent to the regenerative region exhibiting fibroblasts (arrows) (bar: 200  $\mu$ m); (F) Macroscopic view of OM ulceration in another animal 7 days after 5-FU administration. (G) Macroscopic view of PLGA dressing with cells covering the ulceration; (H) macroscopic view of OM ulceration 6 days after PLGA dressing with cells. Note the ulcer regeneration in the jugal mucosa. (I) Histomorphological image of OM ulceration 6 days after PLGA dressing with the addition of cells (bar: 200  $\mu$ m). Note the regenerated epithelial layer (white asterisks) and the newly formed tissue in the subepithelial layer (black asterisk). (J) The same image of (I) showing the proximity of fibroblasts to the basal layer of the epithelium (arrows) in the regenerated area (bar: 200  $\mu$ m). HE stains. Eclipse E800 light microscope (NIKON, Japan).

grade of chemotherapy-induced OM established, our group advanced in an innovative preliminary approach using PLGA dressings with or without the animal's cells. This emerging approach was thought to accelerate the healing process of OM ulcerative lesions.

The implantation of a biomaterial in a host disrupts the homeostasis of the target tissue, which can result in molecular signals towards immune responses [32]. Although the surface properties of a biomaterial play an important role in the modulation of foreign body reactions [32], this reaction can be present in the tissue-material interface as long as the material's fragments persist [32].

According to Siepmann [33], PLGA degrades when in contact with biological fluids, which results in shorter chain alcohols and acids. An accumulation of the latter can lead to significant drops in micro-pH and subsequent acceleration of polymer degradation. Our group previously explored the degradation of PLGA membranes in three important biological fluids for future oral mucosa regeneration [12]: immersion in simulated body fluid

(SBF), culture media (Dulbecco's Modified Eagle's Medium – DMEM) and artificial saliva at 37°C, for 7, 15 and 30 days and compared with the control membrane. In addition, Chor et al. [12], reported that electrospun PLGA 85:15 nonwovens were constituted by a semicrystalline material with moderate degradation properties after thirty days. The PLGA electrospun nonwovens presented a preferential degradation of the amorphous fraction of the material increasing the crystalline content along the time. Based on mass loss after sterilization with gamma radiation, the kinetics of degradation was slower on non-irradiated samples than on irradiated ones. Additionally, SBF showed a higher capacity of influencing crystallinity changes in both irradiated and non-irradiated PLGA nonwovens. In the Fourier-transform infrared spectroscopy (FTIR) analyses, increased OH stretching modes and other additional bands indicated that SBF and saliva induced higher hydrolytic degradation of irradiated PLGA nonwovens. In fact, we monitored the fluid-induced degradation by molecular weight (Mw) of PLGA in

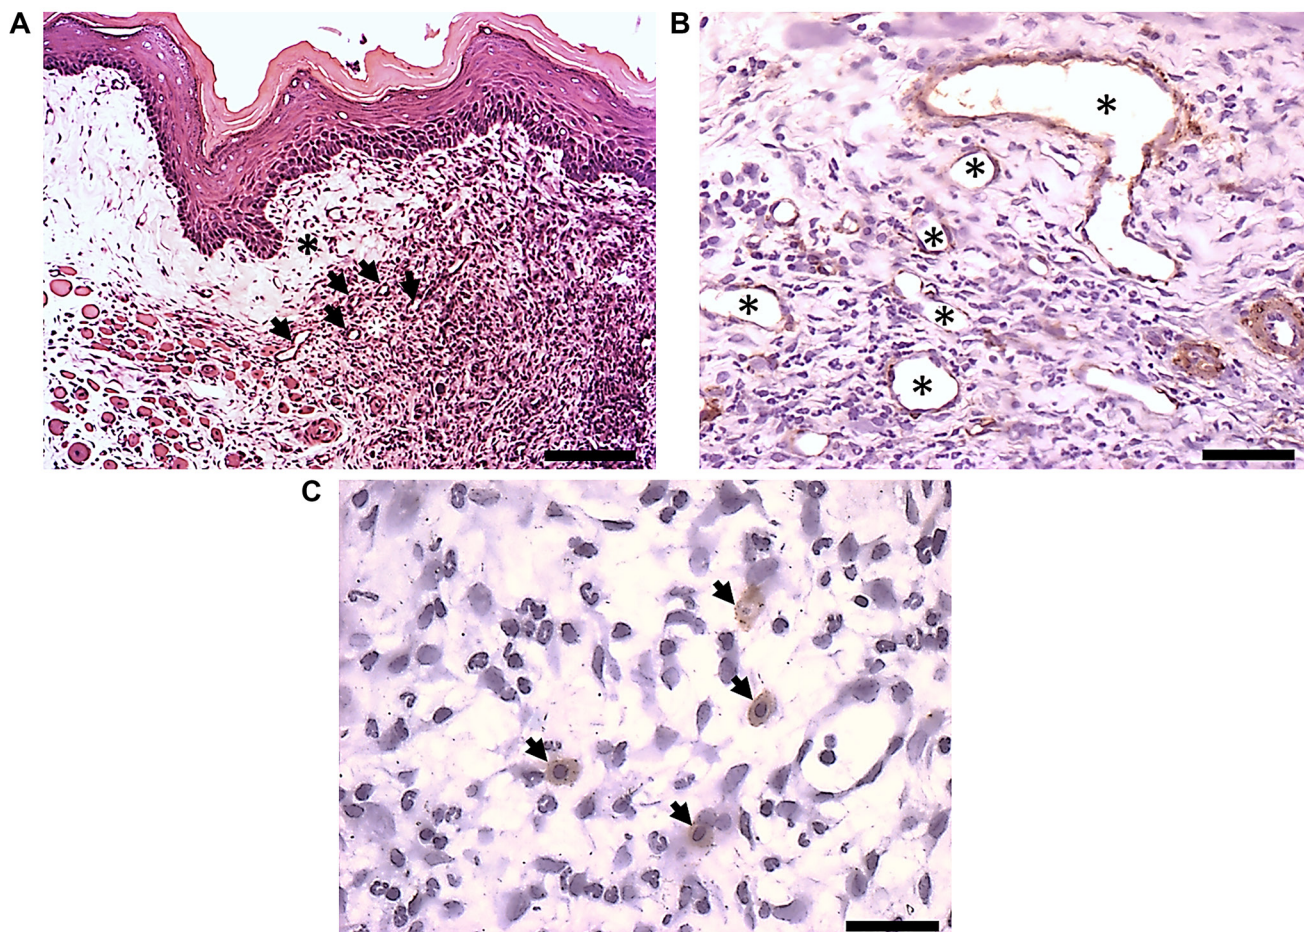

**Figure 5: Immunohistochemistry of  $\alpha$ -SMA and F4/80 positive cells.** Detail of histological sections after PLGA dressing with the animals' cells. (A) Histomorphological image of OM ulceration 6 days after PLGA dressing with cells (bar: 200  $\mu$ m). Note the interface of the ulceration site (white asterisks) with the newly formed tissue in the subepithelial layer (black asterisk), exhibiting new formed vessels (arrows). (B) Detail of histological sections in the interface of the regenerative area showing  $\alpha$ -SMA positive cells in the vessels walls (asterisks) (bar: 100  $\mu$ m). (C) Detail of histological sections in the interface of the regenerative area showing F4/80 positive cells, exhibiting macrophages surrounding a blood vessel in the stroma, at the interface of the regenerative area (bar: 100  $\mu$ m).

nonwovens immersed up to 30 days [12]. Effectively, our results showed a tendency of molecular weight decreasing in non-irradiated and irradiated nonwovens immersed in different solutions in comparison with controls. This event is compatible with cleavage of the covalent bonds in the polymer backbone [12]. Although the mass loss recorded is compatible with an initial process of polymer degradation [12] the structures of the polymer were preserved for ideal cell ingrowth and proliferation, as showed in our reports of *in vitro* experiments [25]. In the latter, the promising results showed that our manufactured membrane is an ideal scaffold for regenerative purposes as shown in the preliminary approach reported in the

present work. In addition, we explored the implantation of electrospun PLGA membranes ( $1\text{ cm}^2 \times 1\text{ cm}^2$ ) in the back of hamsters along 7, 15, 30 and 90 days to observe tissue interactions with the manufactured biomaterial [25]. In this regard, transmission electron microscopy analyses showed a decrease in PLGA fragments 90 days post implantation, and internalization of the fragments by epithelioid cells seven days post implantation, without fibrosis or biomaterial encapsulation. Moreover, the chronic inflammatory response decreased 90 days post implantation without fibrosis formation. And, we reported improved vascularization. In the same line, Klubucov [34] also showed improved vascularization

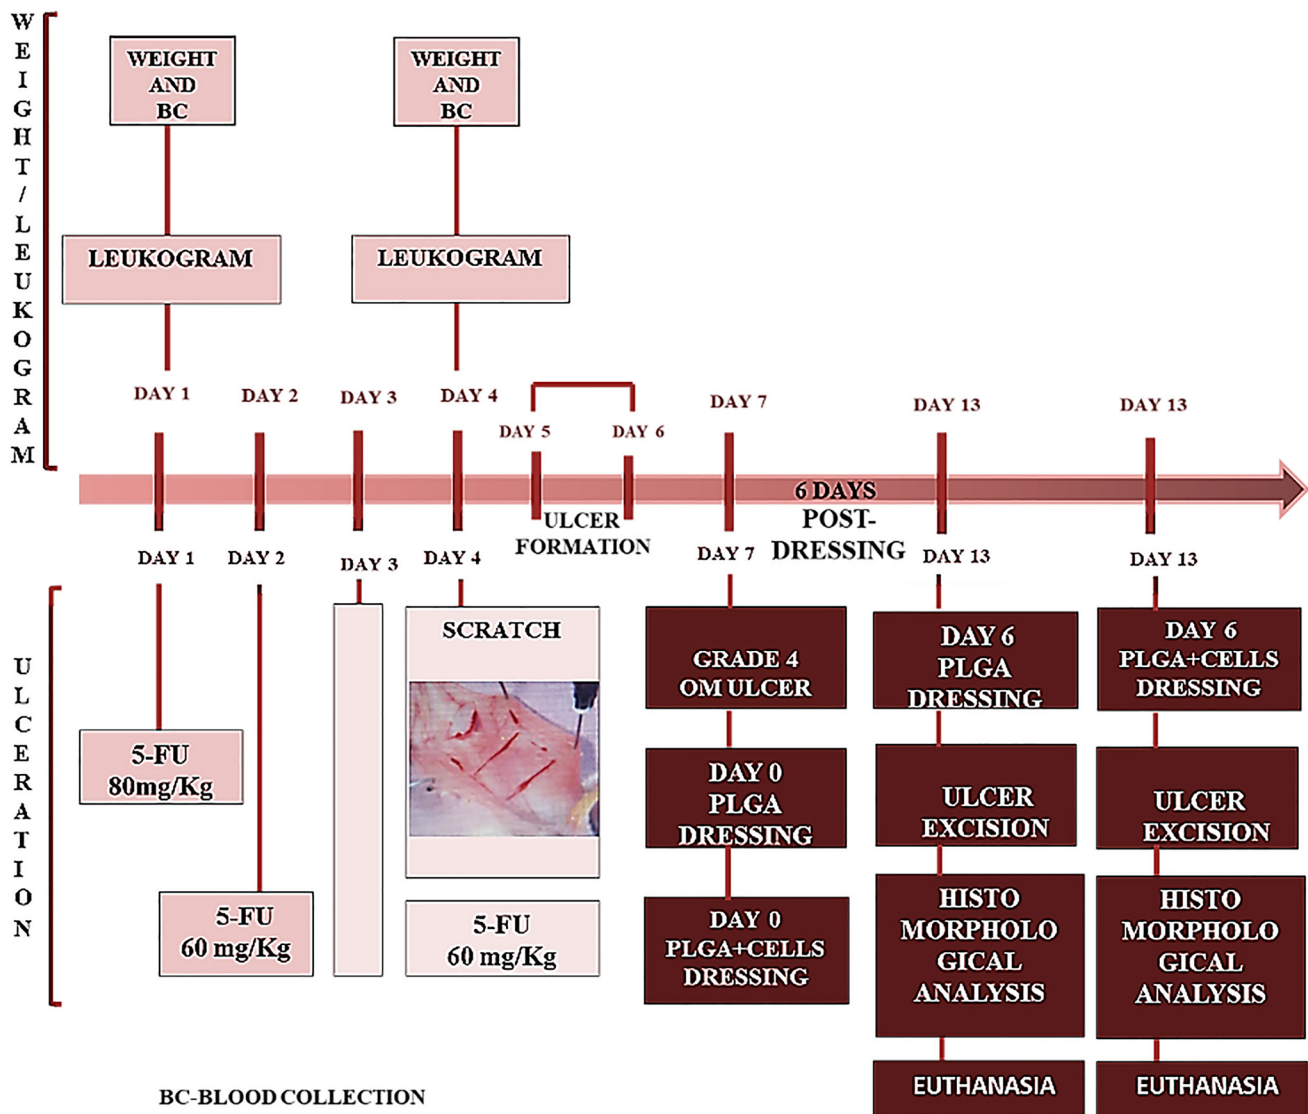

**Figure 6: Timeline diagram presenting the *in vivo* experimental design.** day 1: weight and blood collection for leukogram were performed before the first chemotherapy administration (5-FU/80 mg/Kg). day 2: second day of 5-FU administration (5-FU/60 mg/Kg); day 3: without treatment. day 4: weight and blood collection for leukogram was done before the third chemotherapy administration (5-FU/60 mg/Kg) and scratch on the hamsters' cheek pouch. days 5 and 6: period of time for ulcer formation. day 7: establishment of grade 4 ulceration and treatment with PLGA dressing (day 0 for treatment initiation) with or without hamster's autologous cells. day 13: represents 6 days post PLGA dressing with or without cells. Day of ulcer excision for histomorphological analysis (optical and electron microscopy) and euthanasia.



after 33 days of biomaterial implantation. The author implanted electrospun polycaprolactone microfiber scaffolds with the addition of pCMV-VEGF165-plasmid in the subcutaneous interscapular area of rats at 7, 16, 33, 46, and 64 days. However, vessel growth did not seem to correlate with scaffold degradation rate. Considering the autocatalytic degradation of polyesters, we did not hypothesize a correlation between cell physiology and the degradation process, due to the promising cell proliferation and cell morphology showed by our group in our previous work [25]. In this latter, we explored cell-seeded membrane using Mandy-Darby canine cell line and primary fibroblasts from hamster cheek pouch on to PLGA membranes, which resulted in cell proliferation, as well as cell migration through the pores of the membranes along time. Specifically, the primary fibroblasts exhibited modifications in their morphology. They took a polygonal shape when anchoring among the fibers that forms the pores of the membrane and took an elongated pattern when anchoring along only one fiber. In conclusion, we hypothesized that the autocatalytic degradation process of our semicrystalline scaffold did not influence the promising aforementioned results. The ratio of PLA (85%) and PGA (15%) used to manufacture our membrane, showed an initial fluid-induced degradation process of the amorphous portion, probably due to a higher content of the crystalline portion, which takes a longer time to degrade. As expected, those previously promising results reported by our group, stimulated us to continue our investigations in the bioengineering area, to show our preliminary results for our peers, such as reported here.

Interestingly, in the present work our group observed that PLGA dressing, exclusively, stimulated repair with reepithelization in part of the lesion, but still without firm adhesion between the epithelium and the connective tissue at the edge, with an area of inflammation. On the other hand, the PLGA dressing with the animal's cells stimulated re-epithelialization, with the presence of inflammation in smaller amounts and angiogenesis. The histopathological analyses also revealed macrophages surrounding vessels in the stroma, at the interface of the regenerative area of PLGA dressing with cells, after 6 days post dressing. Other important cells to analyze are macrophages. They have two principal types of differences, which are characterized by distinctly metabolic activities and phenotypic markers (M1 e M2) [35]. Given a classic division, activated macrophages (M1) are associated with acute inflammatory responses. However, alternative macrophages (M2) are associated with inflammatory lesions' resolution [35]. In the present study, the morphological analysis revealed that macrophages are present at the interface of the regenerative area. Then, we can hypothesize they are macrophages that have changed to an alternative phenotype M2 or anti-inflammatory [36, 37], which promotes polymer phagocytosis and releases chemokines that induce angiogenesis and tissue repair [36, 38]. On the

other hand, the M2 type is divided into four categories, in which the first one is related to foreign body reaction formation (M2-a type) and occurs when the immunologic system is exposed to a foreign material or organisms that cannot be engulfed or phagocytosed [35]. Although Chor et al. [25] previously reported foreign body reaction formation in *in vivo* experiments of PLGA implantation, in the present work we did not observe this using the same membrane as dressing for oral mucositis lesions. Other studies using larger samples are necessary to confirm this preliminary result.

On the other hand, the surgical procedure for biomaterial implantation stimulates the release of local mediators that will bind molecular pattern recognition receptors in the cellular types of the innate immune system, leading to the activation of the inflammasome, with consequent expression of proinflammatory cytokines [32]. This phase is associated with an acute inflammatory response and plays an important role in the early adaptive immune response [32]. On the other hand, the biomaterials' degradation products, and the modifications on their surface after implantation, activate interactions with the host immune system and the surrounding microenvironment [32]. The study of the interaction between innate and adaptive immune responses allows better understanding of the immune response to biomaterials, to obtain a balance for better results [32]. This interaction is dependent on the microenvironment surrounding the implant, which orchestrates tissue-specific innate immune responses, followed by the induction of adaptive immune system responses [39]. In the present work, the surgical procedure used to fix the PLGA dressings on the ulcerations did not induce acute inflammatory responses or fibrosis.

Consistent with one of the previous reports of Chor et al. [12], in which emerging therapies for oral mucositis using natural products, drugs, growth factors, cells, and biomaterials, revealed regenerative process in experimental models, in the present work, our group explored for the first time, the potential of autologous mesenchymal cells onto the PLGA membranes for OM re-epithelialization in the experimental model. For instance, Yonezawa [40] showed that films of polyglycolic acid (PGA) adhered on wounds of the tongue of rabbits with fibrin glue, which resulted in re-epithelialization. On the other hand, other studies using PLGA also exhibited promising results. In this line, Lee [41] used electrospun PLGA membranes with or without metformin (antidiabetic) as a dressing to promote the regeneration of skin wounds in diabetic rats; Xu [42] applied PLGA with the addition of mesenchymal cells for bladder regeneration in an experimental rabbit model; Yoshimoto [43] used PLGA for periodontal tissue regeneration, and Hong [44] applied PLGA for corneal regeneration.

In recent clinical studies, Badr [13], used natural products like honey or olive oil to treat chemotherapy-

induced OM in children with leukemia. Serageldin [14], applied Metformin to treat OM of non-diabetic breast cancer patients. Shah [15] used zinc in the prevention of OM in children with cancer receiving intensified chemotherapy. Morsy [17] applied topical Omega-3 nanoemulgel to treat radiotherapy-induced OM in head and neck cancer patients. Moreover, Colella [5] recently reported a collection of therapies, including medications, which showed significant reductions in the severity and incidence of OM. Those emerging therapies, and others that will shortly come, will help cancer patients to overcome the adverse symptoms of treatment, such as oral mucositis lesions.

The present work showed the results of 5-FU-induced immunosuppression and OM regeneration in hamster model. For this goal, we delved into the foundations of the bioengineering field to apply a potential device with the addition of autologous cells. The great impact of this preliminary and innovative approach may be due to the therapeutic potential of the host's mesenchymal cells in treating tissue injuries, associated with the nanotechnology used to produce a scaffold that mimics the organism microenvironment [28]. Due to the complexity of the procedures involving the animals, a limited number of animals was selected for this innovative preliminary approach. The procedures include: the isolation of autologous cells from the hamster cheek pouch to expand and seed in the PLGA membrane to proliferate; production of ulcerative lesions of oral mucositis; and application of the cell-seeded membrane as a dressing onto the ulcerative lesions. To our knowledge, the present work is a first-in-animal model of oral mucositis lesion, in which was explored an emerging approach using a biocompatible electrospun membrane with the addition of autologous cells. Although the present results suggest a great potential for future applications, the low number of animals used may limit the generalizability of the results. This fact encourages us to continue working with pre-clinical studies to show long-term outcome data. Moreover, we expect that, in a near future, the next promising results may be translated from bench to bedside in clinical studies.

## MATERIALS AND METHODS

### *In vivo* experiment

Golden Syrian hamsters were purchased from Oswaldo Cruz Foundation-Rio de Janeiro, Brazil. Animals of six weeks of age were maintained at the Health Science Center bioterium of Federal University of Rio de Janeiro UFRJ-Brazil, in environmental, nutritional, and health-controlled conditions, according to "The Guide for Care and Use of Laboratory Animals" (DHHS Publication No (NIH) 85-23, Office of Science and Health Reports, Bethesda, MD 20892-available at: <http://www.nih.gov>).

The Ethics Committee on the Use of Animals in Scientific Experimentation at the Health Sciences Center at the Federal University of Rio de Janeiro, registered in the National Council for Animal Experimentation Control (CONCEA-Brazil). Therefore, they certified the use of hamsters in the present study (Protocol No. 003/15, approved on 15 April 2015). Animals between 120 and 205 g ( $n = 10$ ) were included in the present study. The animals were kept in appropriate cages containing three animals/cage, lined with sterile shavings, under constant temperature ( $23 \pm 2^\circ\text{C}$ ), in the standard light/dark cycle (12/12 h), with unrestricted access to water and feed. After the experiments animals were euthanized according to the "American Veterinary Medical Association Guidelines on Euthanasia", 2007 (available at <http://www.nih.gov>).

### Leukogram and weight

The 5-FU-induced immunosuppression was monitored through peripheral blood leukogram and weight of 10 animals, performed before 5-FU administration ( $n = 5/\text{group}$ ) or saline solution (SS) (day 1, Figure 6 -  $n = 5/\text{group}$ ) and also on the fourth day after 5-FU or SS administrations (day 4 - Figure 6). To perform the leukogram, 50  $\mu\text{L}$  of peripheral blood was collected from the paw vein, through puncture with a needle ( $13 \times 0.45$  mm) after syringe treatment with sodium heparin by rinsing (Hepamax-S - sodium heparin 5000 IU/mL, Blau Farmacêutica S.A.). The global white blood cell count was determined by optical microscopy and counting in a Neubauer chamber. The leukogram was obtained by averaging two counts in different samples of suspensions of 5  $\mu\text{L}$  of blood diluted in 95  $\mu\text{L}$  of Türk's hemolytic solution (dye for leukocytes).

Another clinical parameter considered along with immunosuppression was the animals' weight before and after 5-FU or SS infusions, which was recorded using an electronic LCD digital weight (Figure 6) and before any procedure that could generate stress in the animals, such as the scratch on the jugal mucosa of the animals for oral mucositis lesions establishment. The weights of the two populations of the animals were recorded before 5-FU and SS administrations. These values were paired with the values of the weight obtained after 4 days of the two modalities of infusions and before the scratch procedure for comparisons (Figure 6).

### 5-Fluorouracil-induced OM ulcerations

To produce OM lesions, the animals were placed in a small containment (EB 285G Containment for rats - Insight equipment, São Paulo - Brazil) with openings on the lateral sides and bottom (Supplementary Figure 1) for breathing. One of the openings at the bottom was used to apply the first infusion of 5-Fluorouracil (5-FU/ Eurofarma) (80 mg/Kg - Figure 6), in the intraperitoneal region. On the second day of the protocol (Figure 6),

animals received the second infusion of 5-FU (60 mg/Kg) when inside the small containment. On the third day of the protocol, animals did not receive 5-FU infusion. On the fourth day of the protocol, animals were anesthetized with ketamine (80 mg/kg) and xylazine (60 mg/kg) to receive a scratch on the right side of their cheek pouch, which was made using a tip of a needle of a 1 mL syringe (Figure 6). The scratches were made horizontally and vertically in the same place of the jugal mucosa. On the same day of scratch, animals received the third 5-FU infusion (60 mg/kg). At days 5th and 6th of the protocol (Figure 6), animals were under observation and resting for ulcer formation. At the 7th day of the protocol, OM grade 4 (ulcerative lesions) were established (Figure 6).

## ***In vitro* experiments**

### **Primary fibroblasts proliferation**

Before the first 5-FU administration, the left side of hamsters' cheek-pouch was excised after intraperitoneal injection of ketamine (80 mg/kg) and xylazine (60 mg/kg) for primary fibroblasts isolation. Day 1 in the timeline diagram is represented by the macroscopic views of the cheek pouch (Figure 7A), and the excised cheek pouch (Figure 7B) of the animal. The excised cheek pouch was washed with povidone-iodine for 5 min. Next, rinsed with a saline solution 1 min, and after with nystatin (100.000 UI/Laboratorio Teuto S/A-Brasil) for 5 min. Finally, it was immersed in sterile saline solution for 5 min. Tissues were sectioned into small pieces under a laminar flow hood (Vertical laminar flow-Pachane LTDA, model PA 320, No. 03201. Piracicaba, Brasil); immersed in collagenase type 1 solution (1 mg/mL-Gibco/Life Technologies) in culture medium (100 mL) inside an incubator at 37°C under agitation for 3 h and inactivated using fetal bovine serum (10%-Vitrocell/lot 014/18). Finally, the cells were isolated by filtration (cell strainer 100 µm/Sigma-Aldrich) and centrifugation (700 g) of the supernatant. The pellet was suspended in 1 mL low glucose DMEM culture medium, supplemented with 10% fetal bovine serum, 100 IU/mL penicillin, 100 mg/mL streptomycin and 0.01 mg/mL amphotericin (Sigma Aldrich, St. Louis, MO, USA). Next, cells were plated in a 25 cm<sup>2</sup> culture bottle containing 4 mL culture medium and kept in an incubator at 37°C in a 5% CO<sub>2</sub> atmosphere. Culture medium was changed every 48 h after three washes with PBS and stored at 37°C in a 5% CO<sub>2</sub> atmosphere for 4 days (Figure 7C depicts cells in the culture dish).

### **PLGA membranes with cells**

The membranes were covered with 100 µL of mouse collagen solution (Sigma-Aldrich) 10% (v/v) in serum-free DMEM. Next, the membranes were incubated in the laminar flow for 1 h, washed with PBS and dried in the laminar flow for another 1 hour. Next, the PLGA

membranes were seeded with  $3 \times 10^5$  cells in 100 µL of complete DMEM and incubated over 3 days for cell adhesion and proliferation (Figure 7). Four days after cell proliferation (day 7 in the timeline diagram - Figure 7) the membranes (Figure 7D, 7E) were prepared for optical microscopy analyses (Nikon/ECLIPSE Ti-S/objective 20X) to confirm cell proliferations on PLGA. Figure 7D depicts PLGA membrane with cells and figure E is the same image of D, which was colored with a fluorescent CellTracker red to monitor the location of the live cells on to the membrane (*Cell Tracker-red/Molecular Probes Life Technologies/lot 1756851*).

### **PLGA membranes onto the OM lesions**

On the 7th day of the protocol (Figure 6) the PLGA membranes with the addition of cells were ready to be applied on to the ulceration (first day of treatment - day 0 - Figure 6) and remained for 6 days. At the same time, the membrane without cells was applied on to the ulceration of another animal. The membranes were fixed after animals' anesthesia and using a gamma radiation sterilized shirt button over the membrane (Supplementary Figure 2) [45]. The cellularized part of the membrane was applied on the ulceration, and the button was fixed on the other side of the membrane. The button was sutured using nylon (Nylon 5-0 c/24 1,5 Cm-*Shalon*) (Supplementary Figure 2). The suture knot was fixed on the animal's face (Supplementary Figure 3). After the surgical procedure, the animals were kept in the Laboratory until they started to move. After that, the animals were transferred to their cages, containing only one animal in each cage. After six days of PLGA dressing fixation, (the 13th day of the protocol in the timeline diagram-Figure 7), the animals were anesthetized for surgical excision of the ulceration area for histomorphological analysis. Next, the animals were euthanized, by inhaling CO<sub>2</sub> followed by decapitation using a guillotine. This first-in-animal model protocol for OM regeneration was registered to request a patent at the Industrial Property of National Institute, Brazil (Process number: BR 10 2023 027509 5), by *Núcleo de Inovação Tecnológica das Unidades de Pesquisa do MCTI/RJ-NITRIO* at the Brazilian Center for Research in Physics, Brazil.

## **Sample preparation for morphological analyses**

### **Light microscopy**

The ulcer samples excised after material implantation were fixed in 4% paraformaldehyde in PBS, pH 7.4 at 4°C for 2 h. Next, washed in water, dehydrated in serial solutions of ethanol (from 30% to 100% twice for 20 min), clarified in xylene (2 baths of 30 min), and embedded in paraffin. Sections of 5 µm-thick were performed on a rotary microtome (Leica Microsystem RM 2125®, Wetzlar, Germany) and collected on glass

slides. Dried histological sections were stained with hematoxylin-eosin (HE). The samples were analyzed by light microscopy (Eclipse E800 light microscope, NIKON, Japan).

### Immunohistochemistry

Paraffin sections were collected on silanized histological slides (Sakura Finetek, Staufen, Germany) for immunohistochemistry. After adhesion, histological sections were dewaxed in xylene and hydrated. The samples were washed with 50 mM ammonium chloride solution, in phosphate buffered saline (PBS) pH 8.0, for 15 min, to block free aldehyde residues and washed in PBS; permeabilized with Triton X100 (0.5%) in PBS for 15 min, followed by a bath containing 0.3% hydrogen-peroxide in methanol to inhibit endogenous peroxidase for 15 min, in the dark. After washing with PBS, pH

7.4, sections were submitted to heat-mediated antigen retrieval in either the microwave (potency 800 W) or steamer, according to the antibody used (Table 3). After cooling, the histological sections were incubated with PBS containing 5% bovine serum albumin (BSA), normal 5% goat serum (1 h) in a humid chamber at room temperature, and then, primary antibodies (Table 3) were incubated. Sections were maintained in a humid chamber for about 20 h in the refrigerator. Afterwards, the sections were washed in a PBS solution containing 0.25% Tween-20 (PBS-Tween), followed by incubation with the secondary antibody conjugated to peroxidase (Envision TM Dual link system HRP-cat. No. K4601- Dako, CA, USA) for 1 h, followed by washes in PBS-Tween. Peroxidase was developed with the chromogenic substrate diaminobenzidine (Liquid DAB, Dako, cat. No. K3468), followed by washes in PBSTween and distilled water and sections were dehydrated in ethanol and clarified

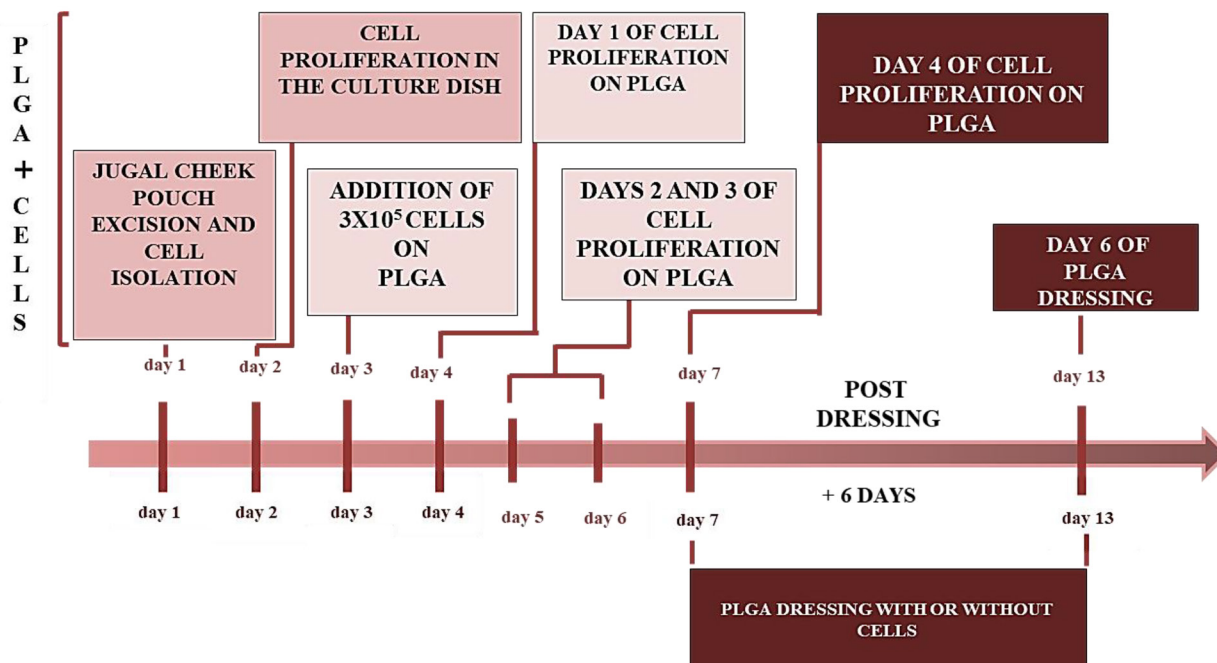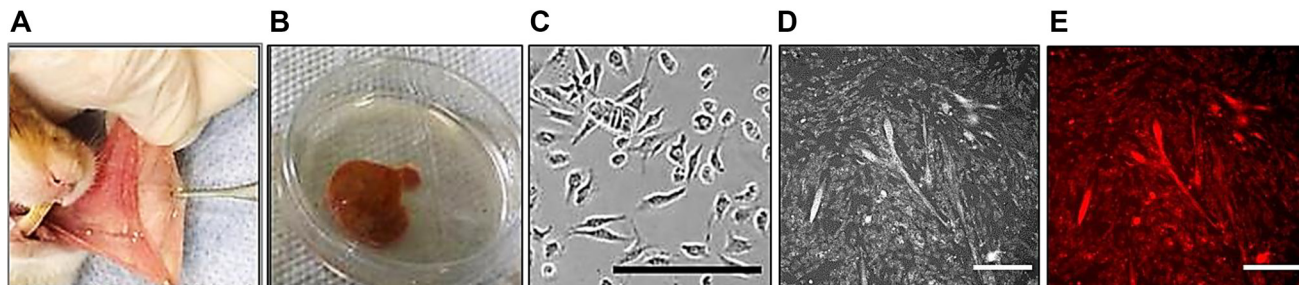

**Figure 7: Timeline diagram showing cell isolation and proliferation on PLGA.** Day 1, excision of the jugal cheek pouch and cell isolation (A, B); day 2, cell proliferation in the culture dish, such as represented by the cells in an amplified image in (C) (Nikon/ECLIPSE Ti-S/objective 20X); day 3, addition of  $3 \times 10^5$  cells on the PLGA membrane; days 4, 5, 6, 7, the cells were proliferating on the PLGA membrane (D, E - Cell Tracker-red/Molecular Probes Life Technologies/lot 1756851/Nikon/ECLIPSE Ti-S/objective 20X); day 7, the PLGA dressing with or without cells were applied to the ulcerative lesions as dressings for 6 days; day 13, the dressing was removed and the ulceration region was excised for optical microscopy analysis. Scale bars: 100  $\mu$ m.

**Table 3: Characteristics of antibodies used and antigenic recovery in the immunohistochemistry assays**

| Antibody      | Manufacturer                                    | Antigenic recovery                                | Dilution |
|---------------|-------------------------------------------------|---------------------------------------------------|----------|
| $\alpha$ -SMA | Dako, polyclonal rat, cat.# GkX-5010            | Steamer 20 min, Citrate Buffer 0.01 M pH 6.0      | 1: 100   |
| F4/80         | AbCam, CA, USA, polyclonal rabbit, cat.# ab9535 | Microwave—3 min 3 x, Citrate Buffer 0.01 M pH 6.0 | 1:100    |

in xylene. Then sections were mounted with Entellan<sup>®</sup>. Negative controls were performed by incubating the histological sections with non-immune rabbit or mouse serum or with the antibody diluent in place of the primary antibody. The samples were analyzed by light microscopy (Eclipse E800 light microscope, NIKON, Japan).

### Statistical analysis

Two leucograms were performed for each animal, and the average of the readings was considered the final result before and after 5-FU infusion or saline solution, for statistical analysis. Wilcoxon test was used for comparisons between independent leukograms of the same population, paired to be analyzed in different times. Mann Whitney Test was used for comparisons between independent leukograms from independent treatments, in different populations of animals at the same time.

The weights of the two independent populations of animals were recorded before and after 5-FU and SS administrations for statistical analysis. Paired *t*-test was used for comparisons between independent weights in the same population of animals, paired to be analyzed in different times. Graph pad Prisma version 5.0 was used for statistical analysis, and the  $p < 0,05$  value was considered the reference of the statistical hypothesis for leucogram and weight.

### CONCLUSIONS

In the present study, leukopenia and weight loss were induced by 5-Fluorouracil infusions confirming the immunosuppression in hamster's model. In virtue of these parameters, OM ulcerations were established in the buccal mucosa of the animals. The combined tools of nanotechnology and biology allowed the design of the present innovative approach in the bioengineering area. The application of electrospun PLGA membrane with the addition of autologous cells for OM ulceration, revealed a promising regenerative result. This potential result will boost other studies in the tissue engineering of the buccal mucosa in a near future.

### AUTHOR CONTRIBUTIONS

Investigation and writing original draft preparation, A.C.; Investigation and writing original draft preparation H.S.D.; writing-review and editing C.M.T.; formal

analysis, R.P.G.; formal analysis, M.F.; writing-review and editing, M.L.D.; Conceptualization and writing-review and editing A.M.R. All authors have read and agreed to the published version of the manuscript.

### CONFLICTS OF INTEREST

Authors have no conflicts of interest to declare.

### ETHICAL STATEMENT

The ethical committee for animal use in scientific experiments (Comissão de Ética no Uso de Animais—CEUA) at Health Science Center at Federal University of Rio de Janeiro, Brazil, registered in the National Council of Animal Experimental Control (Conselho Nacional de Controle de Experimentação Animal-CONCEA), process number 01200.001568/2013 - certified the use of hamsters in this study (Protocol No. 003/15, on 04/15/2015), acquired from Oswaldo Cruz Foundation (Fundação Oswaldo Cruz-Fiocruz).

### FUNDING

The authors thank the Brazilian Agencies Conselho Nacional de Desenvolvimento Científico e Tecnológico (CNPq; Grant No. 310917/2014-0, Marcos Lopes Dias.; Grant No. 308287/2016-9, Marcos Farina.), Fundação de Amparo à Pesquisa do Estado do Rio de Janeiro, FAPERJ (Grant No. E-26/201.304/2014, Marcos Lopes Dias; Grant No. E-26/203.028/2017, Marcos Farina.), and Coordenação de Aperfeiçoamento de Pessoal de Nível Superior (CAPES), for financial support and INCT-REGENERA (Grant No. 465656/2014-5).

### REFERENCES

1. de Almeida JM, Ervolino E, Gusman DJR, Fiorin LG, Alves BES, Guastaldi FPS, Matheus HR. Antineoplastic agents aggravate the damages caused by nicotine on the peri-implant bone: an *in vivo* histomorphometric and immunohistochemical study in rats. *Clin Oral Investig*. 2022; 26:1477–89. <https://doi.org/10.1007/s00784-021-04121-1>. [PubMed]
2. Cheung-Ong K, Giaever G, Nislow C. DNA-damaging agents in cancer chemotherapy: serendipity and chemical biology. *Chem Biol*. 2013; 20:648–59. <https://doi.org/10.1016/j.chembiol.2013.04.007>. [PubMed]

3. Parker WB, Cheng YC. Metabolism and mechanism of action of 5-fluorouracil. *Pharmacol Ther.* 1990; 48:381–95. [https://doi.org/10.1016/0163-7258\(90\)90056-8](https://doi.org/10.1016/0163-7258(90)90056-8). [PubMed]
4. VanderVeen BN, Sougiannis AT, Velazquez KT, Carson JA, Fan D, Murphy EA. The Acute Effects of 5 Fluorouracil on Skeletal Muscle Resident and Infiltrating Immune Cells in Mice. *Front Physiol.* 2020; 11:593468. <https://doi.org/10.3389/fphys.2020.593468>. [PubMed]
5. Colella G, Boschetti CE, Vitagliano R, Colella C, Jiao L, King-Smith N, Li C, Nuoh Lau Y, Lai Z, Mohammed AI, Cirillo N. Interventions for the Prevention of Oral Mucositis in Patients Receiving Cancer Treatment: Evidence from Randomised Controlled Trials. *Curr Oncol.* 2023; 30:967–80. <https://doi.org/10.3390/curroncol30010074>. [PubMed]
6. Treister N, Sonis S. Mucositis: biology and management. *Curr Opin Otolaryngol Head Neck Surg.* 2007; 15:123–29. <https://doi.org/10.1097/MOO.0b013e3280523ad6>. [PubMed]
7. Pulito C, Cristaudo A, Porta C, Zapperi S, Blandino G, Morrone A, Strano S. Oral mucositis: the hidden side of cancer therapy. *J Exp Clin Cancer Res.* 2020; 39:210. <https://doi.org/10.1186/s13046-020-01715-7>. [PubMed]
8. Georgiou M, Patapatiou G, Domoxoudis S, Pisteveu-Gompaki K, Papanikolaou A. Oral Mucositis: understanding the pathology and management. *Hippokratia.* 2012; 16:215–16. [PubMed]
9. Bowen JM, Gibson RJ, Keefe DM. Animal models of mucositis: implications for therapy. *J Support Oncol.* 2011; 9:161–68. <https://doi.org/10.1016/j.suponc.2011.04.009>. [PubMed]
10. Monti-Hughes A, Aromando RF, Pérez MA, Schwint AE, Itoiz ME. The hamster cheek pouch model for field cancerization studies. *Periodontol 2000.* 2015; 67:292–11. <https://doi.org/10.1111/prd.12066>. [PubMed]
11. Ribeiro SB, de Araújo AA, Oliveira MMB, Santos Silva AMD, da Silva-Júnior AA, Guerra GCB, Brito GAC, Leitão RFC, Araújo Júnior RF, Garcia VB, Vasconcelos RC, de Medeiros CAC. Effect of Dexamethasone-Loaded PLGA Nanoparticles on Oral Mucositis Induced by 5-Fluorouracil. *Pharmaceutics.* 2021; 13:53. <https://doi.org/10.3390/pharmaceutics13010053>. [PubMed]
12. Chor A, Skeff MA, Takiya C, Gonçalves R, Dias M, Farina M, Andrade LR, Coelho VM. Emerging approaches of wound healing in experimental models of high-grade oral mucositis induced by anticancer therapy. *Oncotarget.* 2021; 12:2283–99. <https://doi.org/10.18632/oncotarget.28091>. [PubMed]
13. Badr LK, El Asmar R, Hakim S, Saad R, Merhi R, Zahreddine A, Muwakkit S. The efficacy of honey or olive oil on the severity of oral mucositis and pain compared to placebo (standard care) in children with leukemia receiving intensive chemotherapy: A randomized controlled trial (RCT). *J Pediatr Nurs.* 2023; 70:e48–53. <https://doi.org/10.1016/j.pedn.2022.12.003>. [PubMed]
14. Serageldin MA, Kassem AB, El-Kerm Y, Helmy MW, El-Mas MM, El-Bassiouny NA. The Effect of Metformin on Chemotherapy-Induced Toxicities in Non-diabetic Breast Cancer Patients: A Randomised Controlled Study. *Drug Saf.* 2023; 46:587–99. <https://doi.org/10.1007/s40264-023-01305-4>. [PubMed]
15. Shah D, Gupta A, Meena JP, Kumar Gupta A, Velpandian T, Pandey RM, Makkar H, Seth R. Efficacy and safety of zinc in the prevention of oral mucositis in children with cancer receiving intensified chemotherapy: A randomized double-blind placebo-controlled trial. *Pediatr Blood Cancer.* 2023; 70:e30309. <https://doi.org/10.1002/pbc.30309>. [PubMed]
16. Morsy BM, El Domiaty S, Meheissen MAM, Heikal LA, Meheissen MA, Aly NM. Omega-3 nanoemulgel in prevention of radiation-induced oral mucositis and its associated effect on microbiome: a randomized clinical trial. *BMC Oral Health.* 2023; 23:612. <https://doi.org/10.1186/s12903-023-03276-5>. [PubMed]
17. Vilar CJF, Ribeiro SB, de Araújo AA, Guerra GCB, de Araújo Júnior RF, Brito GAC, Leitão RFC, Pontes DL, Gasparotto LHD, Oliveira MMB, Viana AD, de Medeiros WMT, Bezerra BGP, de Medeiros CAC. Effect of Gold Nanoparticle on 5-Fluorouracil-Induced Experimental Oral Mucositis in Hamsters. *Pharmaceutics.* 2020; 12:304. <https://doi.org/10.3390/pharmaceutics12040304>. [PubMed]
18. Chen S, Liu B, Carlson MA, Gombart AF, Reilly DA, Xie J. Recent advances in electrospun nanofibers for wound healing. *Nanomedicine (Lond).* 2017; 12:1335–52. <https://doi.org/10.2217/nmm-2017-0017>. [PubMed]
19. Keirouz A, Wang Z, Reddy VS, Nagy ZK, Vass P, Buzgo M, Ramakrishna S, and N. Radacsi. The History of Electrospinning: Past, Present, and Future Developments. *Adv Mater Technol.* 2023; 8, 2201723. <https://doi.org/10.1002/admt.202201723>.
20. Cleeton C, Keirouz A, Chen X, Radacsi N. Electrospun Nanofibers for Drug Delivery and Biosensing. *ACS Biomater Sci Eng.* 2019; 5:4183–205. <https://doi.org/10.1021/acsbomaterials.9b00853>. [PubMed]
21. Chen X, Li H, Xu Z, Lu L, Pan Z, Mao Y. Electrospun Nanofiber-Based Bioinspired Artificial Skins for Healthcare Monitoring and Human-Machine Interaction. *Biomimetics (Basel).* 2023; 8:223. <https://doi.org/10.3390/biomimetics8020223>. [PubMed]
22. Zhang X, Lv R, Chen L, Sun R, Zhang Y, Sheng R, Du T, Li Y, Qi Y. A Multifunctional Janus Electrospun Nanofiber Dressing with Biofluid Draining, Monitoring, and Antibacterial Properties for Wound Healing. *ACS Appl Mater Interfaces.* 2022; 14:12984–13000. <https://doi.org/10.1021/acsaami.1c22629>. [PubMed]
23. Barbosa JAB, de França CA, Gouveia JJS, Gouveia GV, da Costa MM, de Oliveira HP. Eudragit E100/poly(ethylene oxide) electrospun fibers for DNA removal from aqueous solution. *J Appl Polym Sci.* 2019; 136:47479. <https://doi.org/10.1002/app.47479>.

24. Chor A, Gonçalves RP, Costa AM, Farina M, Ponche A, Sirelli L, Schrodj G, Gree S, Andrade LR, Anselme K, Dias ML. In Vitro Degradation of Electrospun Poly(Lactic-Co-Glycolic Acid) (PLGA) for Oral Mucosa Regeneration. *Polymers (Basel)*. 2020; 12:1853. <https://doi.org/10.3390/polym12081853>. [PubMed]
25. Chor A, Takiya CM, Dias ML, Gonçalves RP, Petithory T, Cypriano J, de Andrade LR, Farina M, Anselme K. In Vitro and In Vivo Cell-Interactions with Electrospun Poly (Lactic-Co-Glycolic Acid) (PLGA): Morphological and Immune Response Analysis. *Polymers (Basel)*. 2022; 14:4460. <https://doi.org/10.3390/polym14204460>. [PubMed]
26. Chieruzzi M, Pagano S, Moretti S, Pinna R, Milia E, Torre L, Eramo S. Nanomaterials for Tissue Engineering In Dentistry. *Nanomaterials (Basel)*. 2016; 6:134. <https://doi.org/10.3390/nano6070134>. [PubMed]
27. Hall Barrientos IJ, MacKenzie GR, Wilson CG, Lamprou DA, Coats P. Biological Performance of Electrospun Polymer Fibres. *Materials (Basel)*. 2019; 12:363. <https://doi.org/10.3390/ma12030363>. [PubMed]
28. Eskandar K. Revolutionizing biotechnology and bioengineering: unleashing the power of innovation. *J Appl Biotechnol Bioeng*. 2023; 10:81–88. <https://doi.org/10.15406/jabb.2023.10.00332>.
29. Argilés JM, Busquets S, Stemmler B, López-Soriano FJ. Cancer cachexia: understanding the molecular basis. *Nat Rev Cancer*. 2014; 14:754–62. <https://doi.org/10.1038/nrc3829>. [PubMed]
30. Bertolini M, Sobue T, Thompson A, Dongari-Bagtzoglou A. Chemotherapy Induces Oral Mucositis in Mice Without Additional Noxious Stimuli. *Transl Oncol*. 2017; 10:612–20. <https://doi.org/10.1016/j.tranon.2017.05.001>. [PubMed]
31. Lee HR, Yoo N, Kim JH, Sohn KY, Kim HJ, Kim MH, Han MY, Yoon SY, Kim JW. The Therapeutic Effect of PLAG against Oral Mucositis in Hamster and Mouse Model. *Front Oncol*. 2016; 6:209. <https://doi.org/10.3389/fonc.2016.00209>. [PubMed]
32. Anderson JM, Rodriguez A, Chang DT. Foreign body reaction to biomaterials. *Semin Immunol*. 2008; 20:86–100. <https://doi.org/10.1016/j.smim.2007.11.004>. [PubMed]
33. Siepmann J, Elkharraz K, Siepmann F, Klose D. How autocatalysis accelerates drug release from PLGA-based microparticles: a quantitative treatment. *Biomacromolecules*. 2005; 6:2312–19. <https://doi.org/10.1021/bm050228k>. [PubMed]
34. Klabukov I, Tenchurin T, Shepelev A, Baranovskii D, Mamagulashvili V, Dyuzheva T, Krasilnikova O, Balyasin M, Lyundup A, Krashennnikov M, Sulina Y, Gomzyak V, Krashennnikov S, et al. Biomechanical Behaviors and Degradation Properties of Multilayered Polymer Scaffolds: The Phase Space Method for Bile Duct Design and Bioengineering. *Biomedicines*. 2023; 11:745. <https://doi.org/10.3390/biomedicines11030745>. [PubMed]
35. Brooks PJ, Glogauer M, McCulloch CA. An Overview of the Derivation and Function of Multinucleated Giant Cells and Their Role in Pathologic Processes. *Am J Pathol*. 2019; 189:1145–58. <https://doi.org/10.1016/j.ajpath.2019.02.006>. [PubMed]
36. Chen S, Saeed AFU, Liu Q, Jiang Q, Xu H, Xiao GG, Rao L, Duo Y. Macrophages in immunoregulation and therapeutics. *Signal Transduct Target Ther*. 2023; 8:207. <https://doi.org/10.1038/s41392-023-01452-1>. [PubMed]
37. Franz S, Rammelt S, Scharnweber D, Simon JC. Immune responses to implants - a review of the implications for the design of immunomodulatory biomaterials. *Biomaterials*. 2011; 32:6692–709. <https://doi.org/10.1016/j.biomaterials.2011.05.078>. [PubMed]
38. Mosser DM, Edwards JP. Exploring the full spectrum of macrophage activation. *Nat Rev Immunol*. 2008; 8:958–69. <https://doi.org/10.1038/nri2448>. [PubMed]
39. Mariani E, Lisignoli G, Borzi RM, Pulsatelli L. Biomaterials: Foreign Bodies or Tuners for the Immune Response? *Int J Mol Sci*. 2019; 20:636. <https://doi.org/10.3390/ijms20030636>. [PubMed]
40. Yonezawa H, Yamada S, Yanamoto S, Yoshitomi I, Kawasaki G, Umeda M. Effect of polyglycolic acid sheets with fibrin glue (MCFP technique) on the healing of wounds after partial resection of the border of the tongue in rabbits: a preliminary study. *Br J Oral Maxillofac Surg*. 2012; 50:459–63. <https://doi.org/10.1016/j.bjoms.2011.07.012>. [PubMed]
41. Lee CH, Hsieh MJ, Chang SH, Lin YH, Liu SJ, Lin TY, Hung KC, Pang JH, Juang JH. Enhancement of diabetic wound repair using biodegradable nanofibrous metformin-eluting membranes: in vitro and in vivo. *ACS Appl Mater Interfaces*. 2014; 6:3979–86. <https://doi.org/10.1021/am405329g>. [PubMed]
42. Xu XL, Lu WL, Liu F, Yu JJ, Fan J. Seeding mesenchymal stem cells onto PLGA/collagen compound scaffold for bladder reconstruction in a rabbit model. *Int J Clin Exp Med*. 2018; 11:620–26. <https://e-century.us/files/ijcem/11/2/ijcem0057934.pdf>.
43. Yoshimoto I, Sasaki JI, Tsuboi R, Yamaguchi S, Kitagawa H, Imazato S. Development of layered PLGA membranes for periodontal tissue regeneration. *Dent Mater*. 2018; 34:538–50. <https://doi.org/10.1016/j.dental.2017.12.011>. [PubMed]
44. Hong S, Yun JH, Kim ES, Kim JS, Tchah H, Hwang C. Human Conjunctival Epithelial Sheets Grown on Poly(Lactic-Co-Glycolic) Acid Membranes and Cocultured With Human Tenon's Fibroblasts for Corneal Repair. *Invest Ophthalmol Vis Sci*. 2018; 59:1475–85. <https://doi.org/10.1167/iovs.17-22719>. [PubMed]
45. de Castro LNM, Serricella P, Rodrigues AAF, Takyia CM, da Silva AL, Borojevic R. Uso da Cultura de Mucosa Escamosa Humana no Tratamento de Lesões Jugais Pré-Cancerosas Extensas. *Rev Col Bras Cir*. 2002; 29. <https://doi.org/10.1590/S0100-69912002000600005>.
